# Supplementary material
Source: Preprints.org preprint supplement (doi:10.20944/preprints202008.0525.v2)
Supplement: Supplementary file 3 [file supplementary]

Supporting Information

## *Supplementary Information*

### Supplementary Information 1: Key sources of bias

The species range databases used in this analysis contain biases arising from unequal sampling effort across regions (the Wallacean shortfall) (Menegotto & Rangel, 2018), and a preferential focus on certain subsets of species (the Linnean shortfall) (Bosch et al., 2018; Troudet et al., 2017). The most prominent geographic gaps in global sampling effort are the tropics (across all depths) and deep offshore areas, particularly the deep pelagic region above the seabed (Menegotto & Rangel, 2018; Webb et al., 2010), A second important source of bias arises from uneven sampling across taxonomic groups, where certain types of species are better studied across all latitudes and depth strata. For instance, commercially valuable species, fish and large vertebrates more broadly, hard corals, and vascular plants are much better described than small invertebrates and alga (Menegotto & Rangel, 2018; Mora et al., 2008). The sampling effort biases imply our count-based metrics (e.g. the absolute numbers of transboundary species) may be underestimated more strongly in areas with lower sampling effort. Given that there are no areas in which ranges for all species have been described (the Linnean shortfall) we note that these counts represent the lower limit on the estimated counts for all countries.

## *Supplementary Figures and Tables*


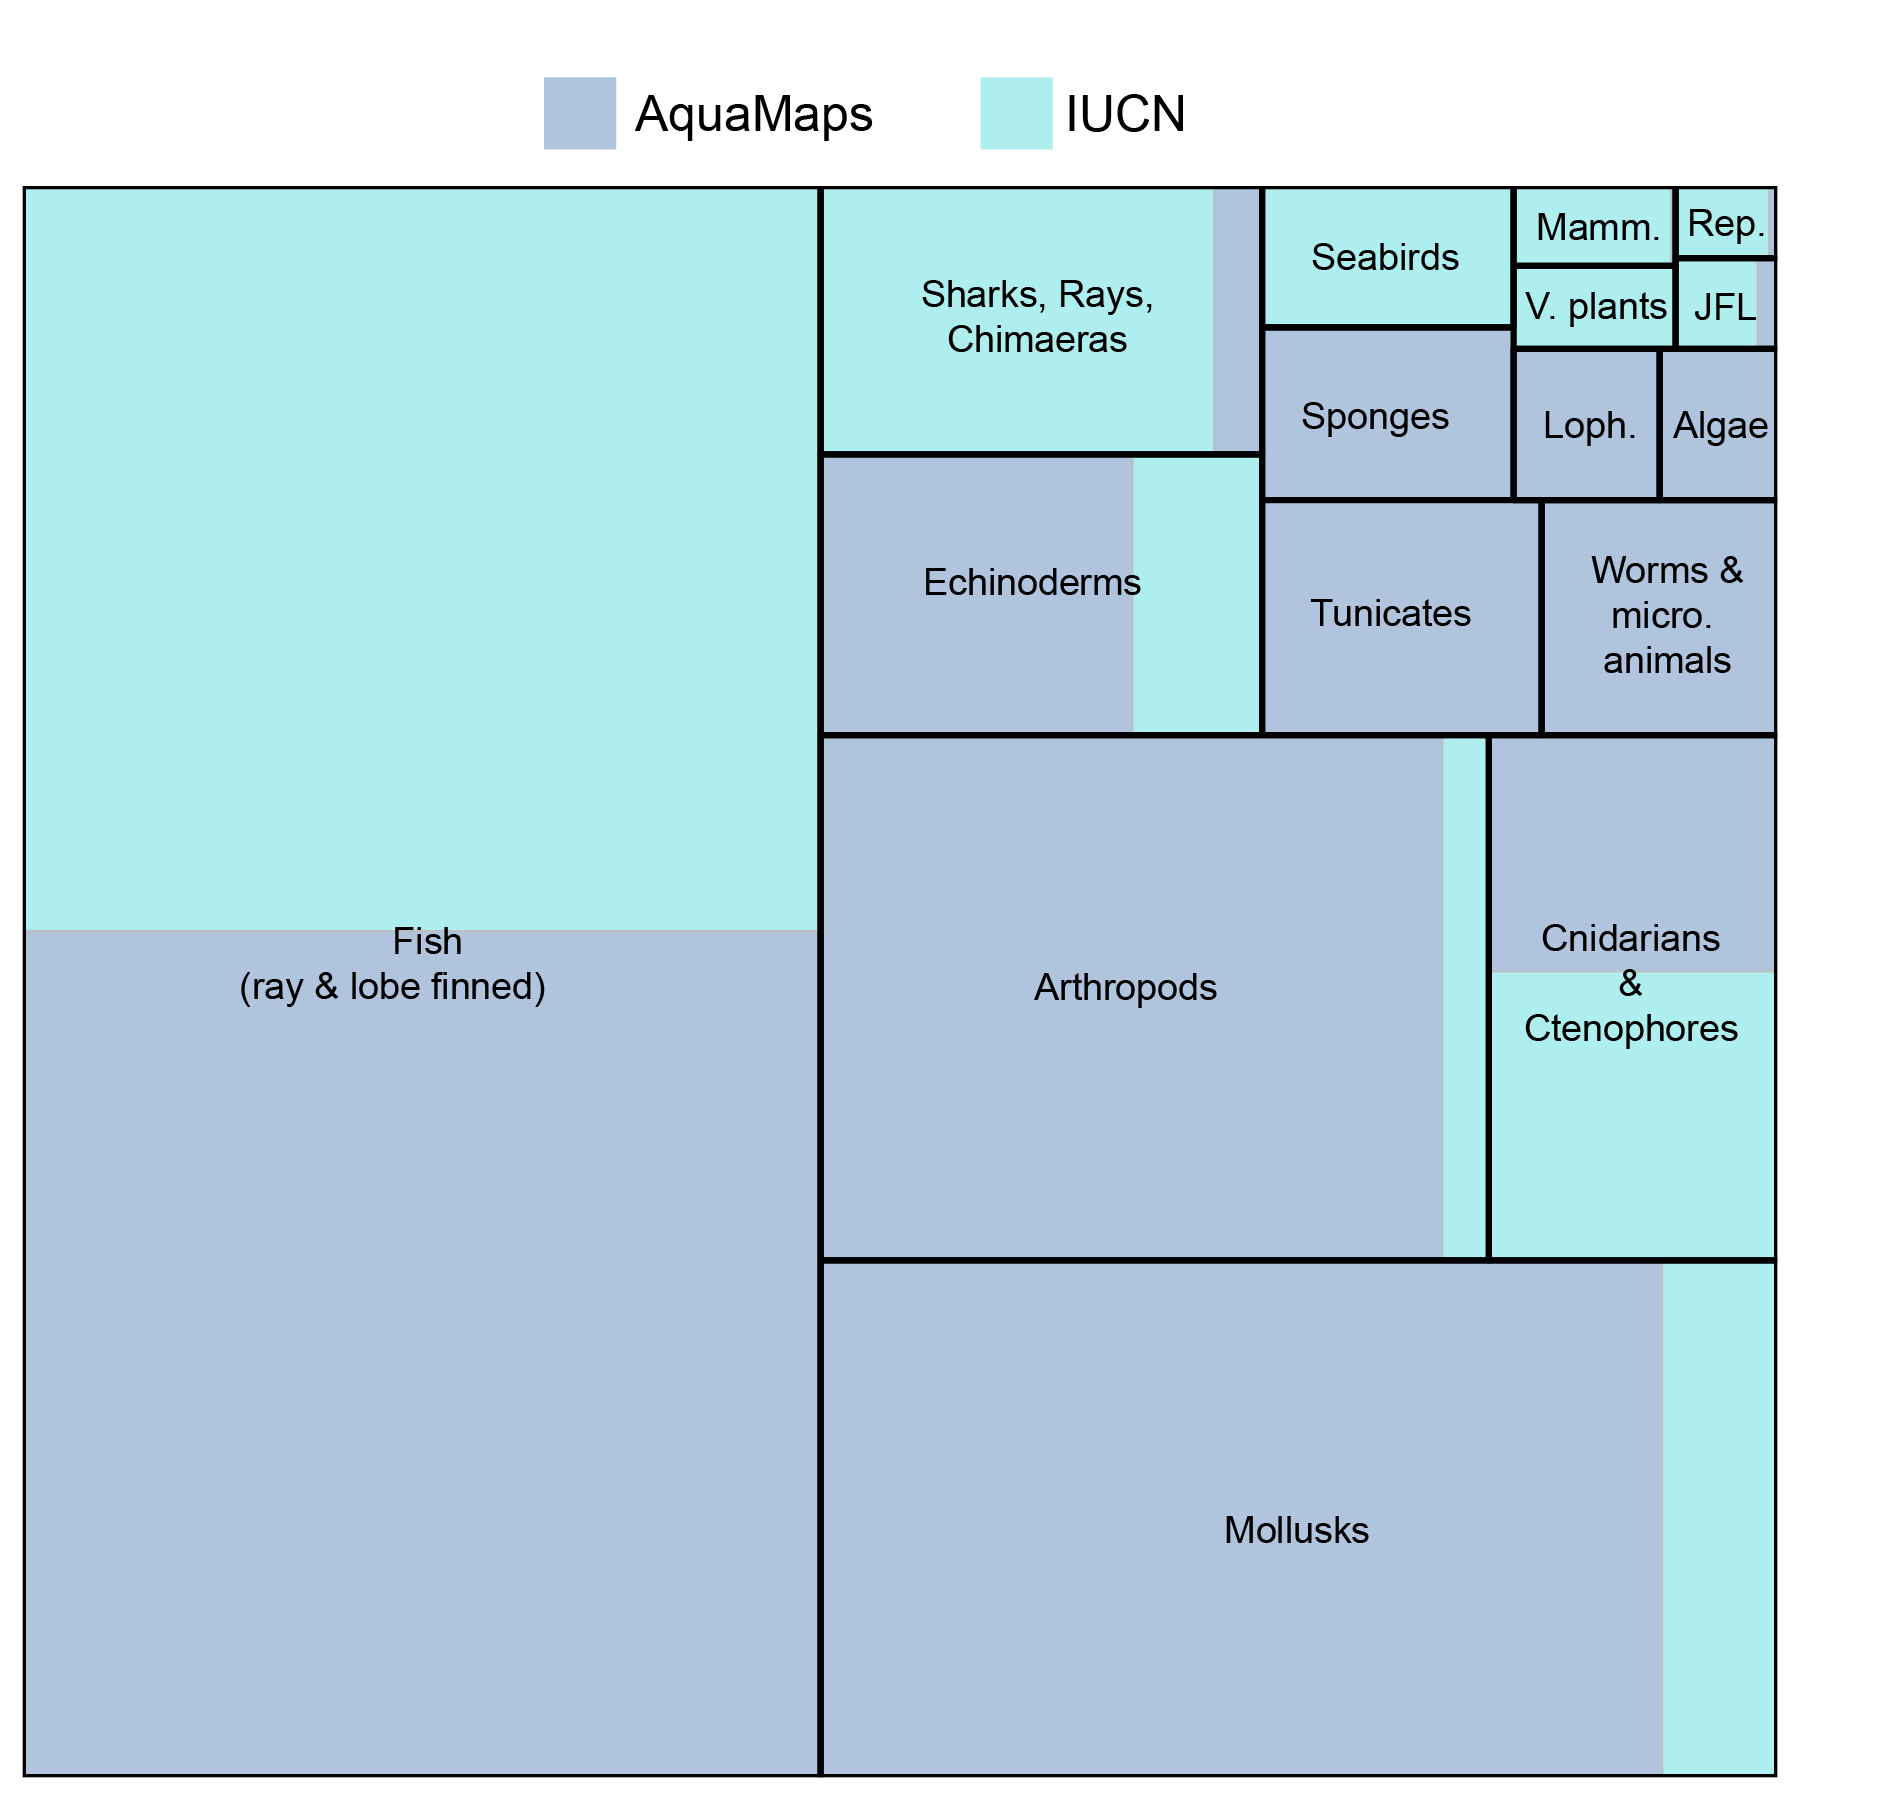


**Supplementary Figure 1:** Proportion of species maps from the AquaMaps and IUCN databases.Mamm=mammals, Rep=Reptiles, V. plants=Vascular plants, JFL=Jawless fish and lancelets, Loph=Lophophores.


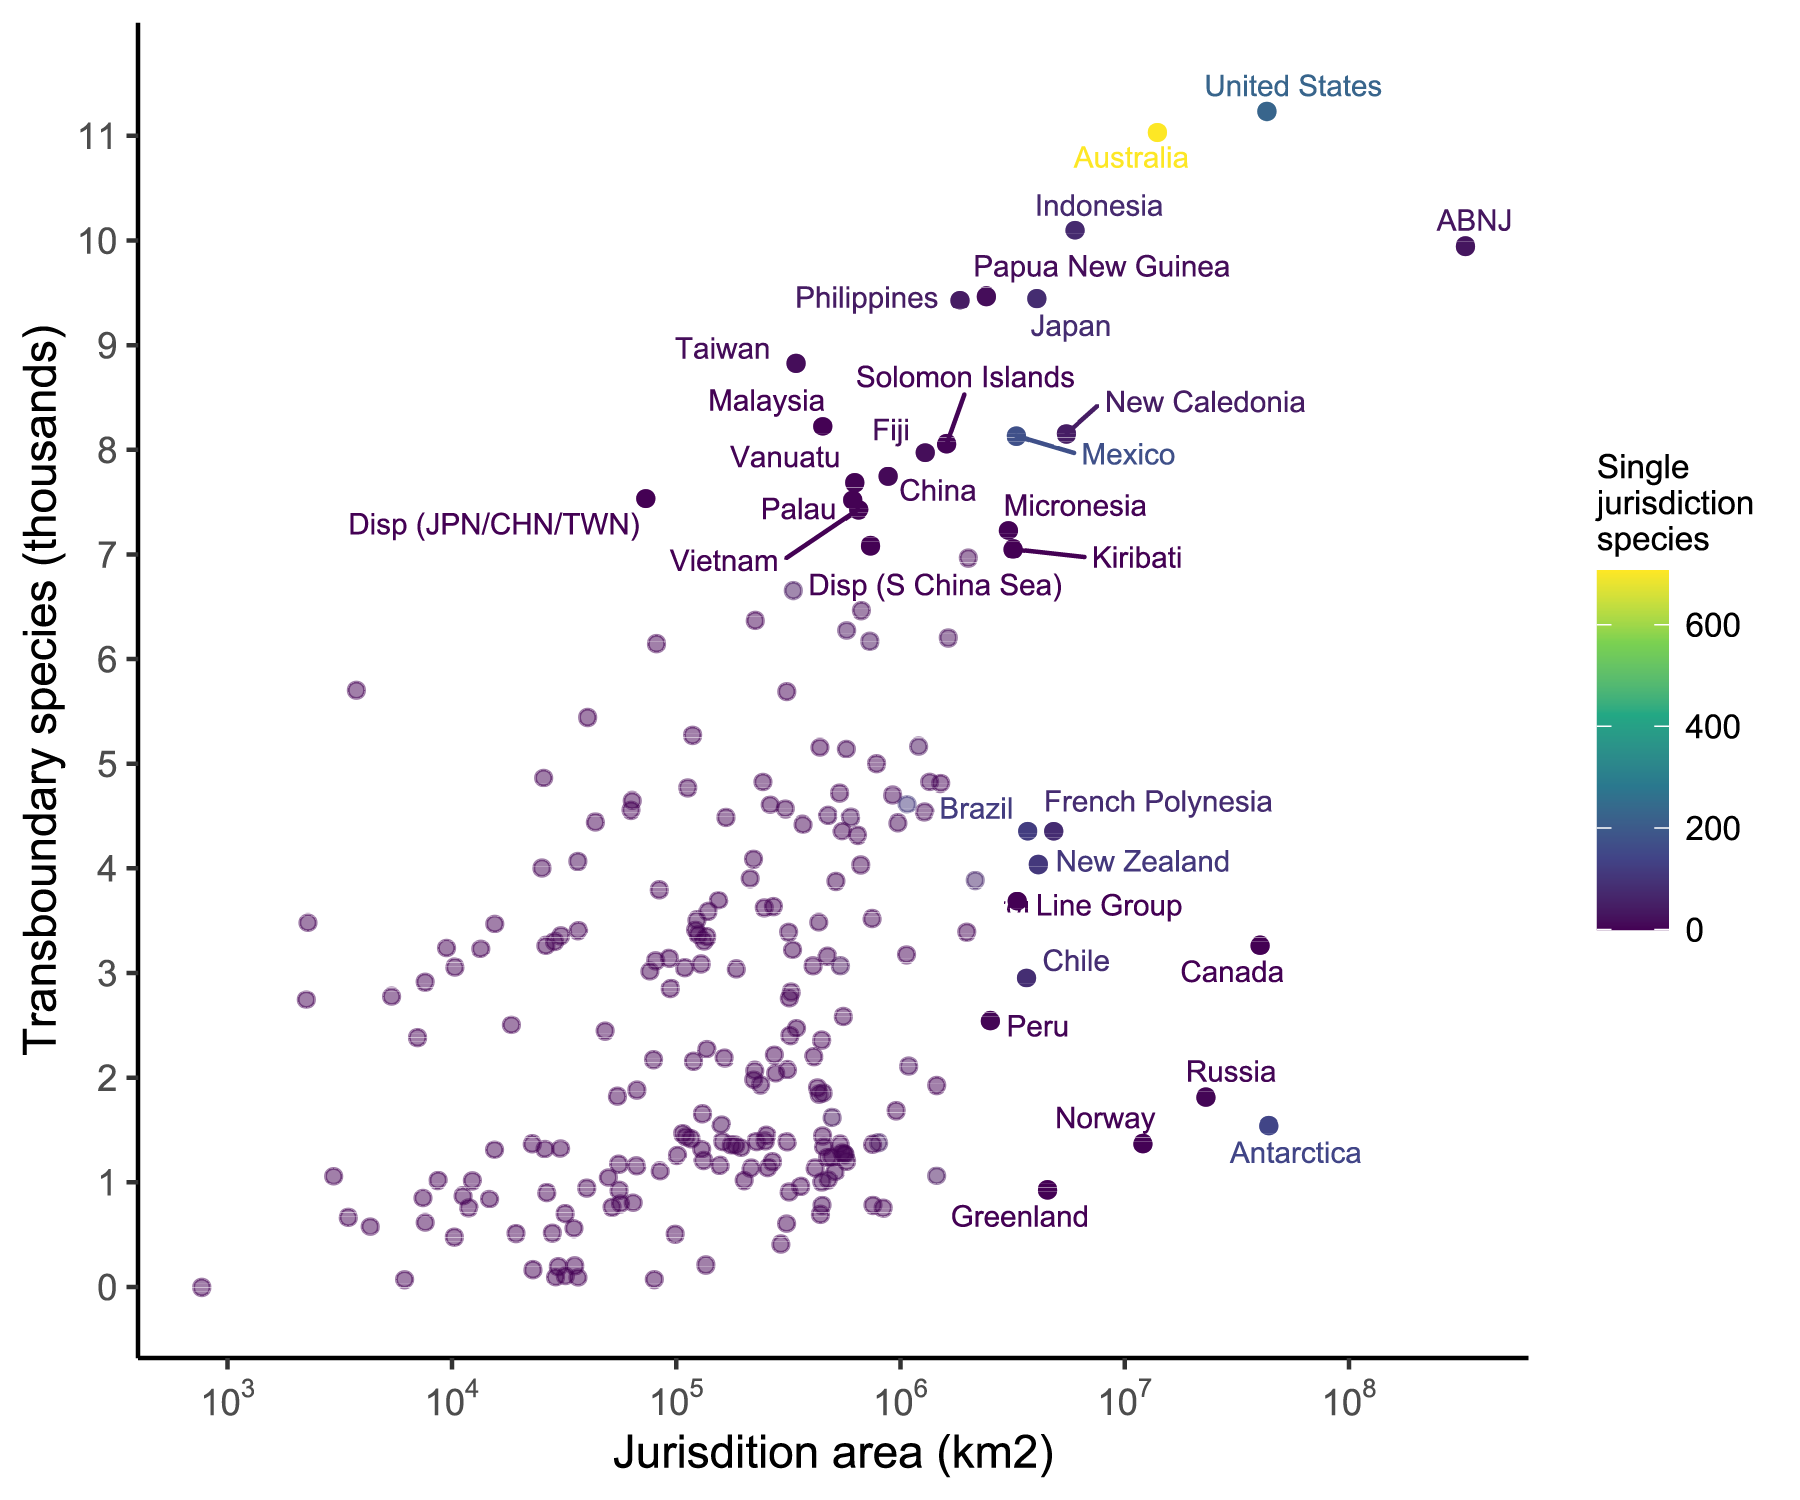


**Supplementary Figure 2**: Transboundary species per area.Number of transboundary species compared to area of jurisdiction (km2), shown on a log10 transformed scale. Labels show jurisdictions ranking in the top 20 for number of transboundary species or for area of jurisdiction. Disp = Disputed territory.

**Supplementary Table 1**: Taxonomic groupings for plant and animal species included in the analysis, and percent of species listed in the Ocean Biogeographic Information System (OBIS) database that have range maps in the IUCN or AquaMaps databases. Four kingdoms were excluded from the analysis. Groupings are not consistent across taxonomic levels (e.g., Mammals are a class of animals, whereas the group Lophophores contains multiple phyla)

| **Group** | **Subgroup 1** | **Subgroup 2** | **OBIS records** | **Records per Group** | **Maps per Group** | **Mapped (%)** |
| --- | --- | --- | --- | --- | --- | --- |
| Algae | Plants | Chlorophyta | 872 | 3970 | 180 | 4.5 |
|  |  | Rhodophyta | 3098 |  |  |  |
| Arthropods | Invertebrates | Arthropoda | 32419 | 32419 | 3553 | 11.0 |
| Cnidarians & Ctenophores | Invertebrates | Cnidarians | 8324 | 8390 | 1532 | 18.3 |
|  |  | Ctenophores | 66 |  |  |  |
| Echinoderms | Invertebrates | Echinodermata | 5710 | 5710 | 1256 | 22.0 |
| Fish (ray & lobe-finned) | Chordates | Actinopterygii | 14530 | 14530 | 12848 | 88.4 |
| Jawless fish & lancelets | Chordates | Agnatha | 76 | 163 | 93 | 57.1 |
|  |  | Cephalochordata | 22 |  |  |  |
|  |  | Myxini | 65 |  |  |  |
| Lophophores | Invertebrates | Brachiopoda | 229 | 3186 | 224 | 7.0 |
|  |  | Bryzoa | 2907 |  |  |  |
|  |  | Entoprocta | 39 |  |  |  |
|  |  | Phoronida | 11 |  |  |  |
| Mammals | Chordates | Mammalia | 135 | 135 | 131 | 97.0 |
| Mollusks | Invertebrates | Mollusca | 26165 | 26165 | 5003 | 19.1 |
| *Reptiles | Chordates | Reptilia | 89 | 89 | 74 | 83.1 |
| *Seabirds | Chordates | Aves | 600 | 600 | 359 | 59.8 |
| *Sharks, Rays, Chimaeras | Chordates | Chondrichthyans | 1053 | 1096 | 1199 | 109.4 |
|  |  | Holocephali | 43 |  |  |  |
| Sponges | Invertebrates | Porifera | 7688 | 7688 | 440 | 5.7 |
| Tunicates | Chordates | Tunicata | 1843 | 1843 | 665 | 36.1 |
| Vascular plants | Plants | Mangroves | *68 | 138 | 136 | 98.6 |
|  |  | Seagrasses | *70 |  |  |  |
| Worms & microscopic animals | Invertebrates | Acanthocephala | 110 | 17425 | 560 | 3.2 |
|  |  | Annelida | 9100 |  |  |  |
|  |  | Chaetognatha | 69 |  |  |  |
|  |  | Echiura | 117 |  |  |  |
|  |  | Gastrotricha | 191 |  |  |  |
|  |  | Gnathostomulida | 39 |  |  |  |
|  |  | Hemichordata | 57 |  |  |  |
|  |  | Mesozoa | 52 |  |  |  |
|  |  | Myxozoa | 48 |  |  |  |
|  |  | Nematoda | 3292 |  |  |  |
|  |  | Nemertea | 362 |  |  |  |
| **Table S1 continued** |  |  |  |  |  |  |
|  |  | Placozoa | 2 |  |  |  |
|  |  | Platyhelminthes | 3186 |  |  |  |
|  |  | Rotifera | 183 |  |  |  |
|  |  | Tardigrada | 202 |  |  |  |
|  |  | Xenacoelomorpha | 415 |  |  |  |
| Excluded |  | Bacteria | 624 | 624 | 5 | 0.8 |
| Excluded |  | Chromista | 10784 | 10784 | 24 | 0.2 |
| Excluded |  | Fungi | 231 | 231 | 0 | 0.0 |
| Excluded |  | Protozoa | 267 | 267 | 18 | 6.7 |
| *The low proportion of reptile and seabird maps compared to species listed in OBIS is due to different designations of species as marine (particularly for shorebirds and snakes). We use an expert-reviewed list of seabirds from BirdLife International, which uses a more conservative definition of a "seabird" compared to OBIS. The proportion of mapped Sharks, Rays, Chimaeras is greater than 100% due to recent changes in taxonomies | | | | | | |

Supplementary Table 2: Species conservation status and taxonomic information. The top 100 species are shown, ranked by number of jurisdictions (Jur.) they occur in. Red List categories (Cat.) are CR = Critically Endangered, EN = Endangered, VU = Vulnerable, NT = Near Threatened, LC = Least Concern, DD = Data Deficient, None = Not assessed.

| Rank | Species name | Jur. | Cat. | Species group | Class |
| --- | --- | --- | --- | --- | --- |
| 1 | *Orcinus orca* | 220 | DD | Mammals | Mammalia |
| 2 | *Balaenoptera acutorostrata* | 211 | LC | Mammals | Mammalia |
| 3 | *Tursiops truncatus* | 211 | LC | Mammals | Mammalia |
| 4 | *Physeter macrocephalus* | 210 | VU | Mammals | Mammalia |
| 5 | *Alopias vulpinus* | 205 | VU | Sharks, Rays, Chimaeras | Chondrichthyes |
| 6 | *Ziphius cavirostris* | 204 | LC | Mammals | Mammalia |
| 7 | *Eretmochelys imbricata* | 203 | CR | Reptiles | Reptilia |
| 8 | *Grampus griseus* | 202 | LC | Mammals | Mammalia |
| 9 | *Megaptera novaeangliae* | 201 | LC | Mammals | Mammalia |
| 10 | *Xiphias gladius* | 201 | LC | Fish (ray & lobe-finned) | Actinopterygii |
| 11 | *Pseudorca crassidens* | 200 | NT | Mammals | Mammalia |
| 12 | *Microlophichthys microlophus* | 200 | LC | Fish (ray & lobe-finned) | Actinopterygii |
| 13 | *Pyroteuthis margaritifera* | 199 | None | Mollusks | Cephalopoda |
| 14 | *Argyropelecus hemigymnus* | 198 | LC | Fish (ray & lobe-finned) | Actinopterygii |
| 15 | *Carcharodon carcharias* | 197 | VU | Sharks, Rays, Chimaeras | Chondrichthyes |
| 16 | *Pteroplatytrygon violacea* | 197 | LC | Sharks, Rays, Chimaeras | Chondrichthyes |
| 17 | *Remora remora* | 197 | LC | Fish (ray & lobe-finned) | Actinopterygii |
| 18 | *Balaenoptera musculus* | 196 | EN | Mammals | Mammalia |
| 19 | *Prionace glauca* | 196 | NT | Sharks, Rays, Chimaeras | Chondrichthyes |
| 20 | *Isurus oxyrinchus* | 195 | EN | Sharks, Rays, Chimaeras | Chondrichthyes |
| 21 | *Katsuwonus pelamis* | 195 | LC | Fish (ray & lobe-finned) | Actinopterygii |
| 22 | *Istiophorus platypterus* | 195 | LC | Fish (ray & lobe-finned) | Actinopterygii |
| 23 | *Stenella coeruleoalba* | 194 | LC | Mammals | Mammalia |
| 24 | *Steno bredanensis* | 192 | LC | Mammals | Mammalia |
| 25 | *Cyclothone braueri* | 192 | LC | Fish (ray & lobe-finned) | Actinopterygii |
| 26 | *Chtenopteryx sicula* | 190 | None | Mollusks | Cephalopoda |
| 27 | *Haliphron atlanticus* | 189 | None | Mollusks | Cephalopoda |
| 28 | *Walvisteuthis virilis* | 189 | None | Mollusks | Cephalopoda |
| 29 | *Lucifer typus* | 187 | None | Arthropods | Malacostraca |
| 30 | *Ulva lactuca* | 187 | None | Algae | Ulvophyceae |
| 31 | *Vitreledonella richardi* | 187 | None | Mollusks | Cephalopoda |
| 32 | *Anoplogaster cornuta* | 187 | LC | Fish (ray & lobe-finned) | Actinopterygii |
| 33 | *Cyclothone pseudopallida* | 187 | LC | Fish (ray & lobe-finned) | Actinopterygii |
| 34 | *Onychoteuthis banksii* | 186 | None | Mollusks | Cephalopoda |
| 35 | *Chauliodus sloani* | 186 | LC | Fish (ray & lobe-finned) | Actinopterygii |
| 36 | *Cranchia scabra* | 185 | None | Mollusks | Cephalopoda |
| 37 | *Lagocephalus lagocephalus* | 185 | LC | Fish (ray & lobe-finned) | Actinopterygii |
| 38 | *Melanocetus johnsonii* | 185 | LC | Fish (ray & lobe-finned) | Actinopterygii |
| 39 | *Sigmops elongatus* | 184 | None | Fish (ray & lobe-finned) | Actinopterygii |
| 40 | *Cryptopsaras couesii* | 184 | LC | Fish (ray & lobe-finned) | Actinopterygii |
| 41 | *Balaenoptera borealis* | 183 | EN | Mammals | Mammalia |
| 42 | *Ulva clathrata* | 182 | None | Algae | Ulvophyceae |
| 43 | *Octopoteuthis sicula* | 182 | None | Mollusks | Cephalopoda |
| 44 | *Kogia breviceps* | 182 | DD | Mammals | Mammalia |
| 45 | *Carcharhinus longimanus* | 182 | VU | Sharks, Rays, Chimaeras | Chondrichthyes |
| 46 | *Cyclothone pallida* | 182 | LC | Fish (ray & lobe-finned) | Actinopterygii |
| 47 | *Chaenophryne ramifera* | 182 | LC | Fish (ray & lobe-finned) | Actinopterygii |
| 48 | *Vampyroteuthis infernalis* | 181 | None | Mollusks | Cephalopoda |
| 49 | *Sternoptyx diaphana* | 180 | None | Fish (ray & lobe-finned) | Actinopterygii |
| 50 | *Scopeloberyx opisthopterus* | 179 | None | Fish (ray & lobe-finned) | Actinopterygii |
| 51 | *Melamphaes polylepis* | 179 | None | Fish (ray & lobe-finned) | Actinopterygii |
| 52 | *Bolitaena pygmaea* | 179 | None | Mollusks | Cephalopoda |
| 53 | *Kogia sima* | 179 | DD | Mammals | Mammalia |
| 54 | *Chaenophryne longiceps* | 179 | LC | Fish (ray & lobe-finned) | Actinopterygii |
| 55 | *Ceratias holboelli* | 179 | LC | Fish (ray & lobe-finned) | Actinopterygii |
| 56 | *Liguriella podophthalma* | 178 | None | Mollusks | Cephalopoda |
| 57 | *Cunina octonaria* | 178 | None | Cnidarians & Ctenophores | Hydrozoa |
| 58 | *Coryphaena hippurus* | 178 | LC | Fish (ray & lobe-finned) | Actinopterygii |
| 59 | *Alopias superciliosus* | 178 | VU | Sharks, Rays, Chimaeras | Chondrichthyes |
| 60 | *Notolychnus valdiviae* | 178 | LC | Fish (ray & lobe-finned) | Actinopterygii |
| 61 | *Melanostomias niger* | 177 | None | Fish (ray & lobe-finned) | Actinopterygii |
| 62 | *Phyllodoce madeirensis* | 177 | None | Worms & microscopic animals | Polychaeta |
| 63 | *Mesoplodon densirostris* | 177 | DD | Mammals | Mammalia |
| 64 | *Cyclothone acclinidens* | 177 | LC | Fish (ray & lobe-finned) | Actinopterygii |
| 65 | *Valenciennellus tripunctulatus* | 176 | None | Fish (ray & lobe-finned) | Actinopterygii |
| 66 | *Gennadas scutatus* | 176 | None | Arthropods | Malacostraca |
| 67 | *Thysanoteuthis rhombus* | 176 | None | Mollusks | Cephalopoda |
| 68 | *Liocranchia reinhardti* | 176 | None | Mollusks | Cephalopoda |
| 69 | *Polycheles typhlops* | 176 | LC | Arthropods | Malacostraca |
| 70 | *Eurypharynx pelecanoides* | 176 | LC | Fish (ray & lobe-finned) | Actinopterygii |
| 71 | *Eustomias dendriticus* | 175 | None | Fish (ray & lobe-finned) | Actinopterygii |
| 72 | *Echeneis naucrates* | 175 | LC | Fish (ray & lobe-finned) | Actinopterygii |
| 73 | *Bentheogennema intermedia* | 174 | None | Arthropods | Malacostraca |
| 74 | *Gelidium pusillum* | 174 | None | Algae | Florideophyceae |
| 75 | *Didemnum candidum* | 174 | None | Tunicates | Ascidiacea |
| 76 | *Ommastrephes bartramii* | 174 | None | Mollusks | Cephalopoda |
| 77 | *Glycera tesselata* | 174 | None | Worms & microscopic animals | Polychaeta |
| 78 | *Cyclothone alba* | 174 | LC | Fish (ray & lobe-finned) | Actinopterygii |
| 79 | *Lobianchia gemellarii* | 174 | LC | Fish (ray & lobe-finned) | Actinopterygii |
| 80 | *Nemichthys scolopaceus* | 173 | None | Fish (ray & lobe-finned) | Actinopterygii |
| 81 | *Systellaspis debilis* | 173 | None | Arthropods | Malacostraca |
| 82 | *Japetella diaphana* | 173 | None | Mollusks | Cephalopoda |
| 83 | *Remora osteochir* | 173 | LC | Fish (ray & lobe-finned) | Actinopterygii |
| 84 | *Sergia japonica* | 172 | None | Arthropods | Malacostraca |
| 85 | *Sandalops melancholicus* | 172 | None | Mollusks | Cephalopoda |
| 86 | *Lysidice collaris* | 172 | None | Worms & microscopic animals | Polychaeta |
| 87 | *Globicephala macrorhynchus* | 172 | LC | Mammals | Mammalia |
| 88 | *Euprotomicrus bispinatus* | 172 | LC | Sharks, Rays, Chimaeras | Chondrichthyes |
| 89 | *Taaningichthys bathyphilus* | 172 | LC | Fish (ray & lobe-finned) | Actinopterygii |
| 90 | *Scopelarchus analis* | 172 | LC | Fish (ray & lobe-finned) | Actinopterygii |
| 91 | *Ranzania laevis* | 171 | None | Fish (ray & lobe-finned) | Actinopterygii |
| 92 | *Gnathophausia zoea* | 171 | None | Arthropods | Malacostraca |
| 93 | *Stenella attenuata* | 171 | LC | Mammals | Mammalia |
| 94 | *Mobula birostris* | 171 | VU | Sharks, Rays, Chimaeras | Chondrichthyes |
| 95 | *Malacosteus niger* | 170 | None | Fish (ray & lobe-finned) | Actinopterygii |
| 96 | *Bathothauma lyromma* | 170 | None | Mollusks | Cephalopoda |
| 97 | *Pterygioteuthis giardi* | 170 | None | Mollusks | Cephalopoda |
| 98 | *Manta birostris* | 169 | None | Sharks, Rays, Chimaeras | Elasmobranchii |
| 99 | *Systellaspis pellucida* | 169 | None | Arthropods | Malacostraca |
| 100 | *Balaenoptera brydei* | 169 | None | Mammals | Mammalia |
|  |  |  |  |  |  |

Supplementary Table 3: Species totals for 228 jurisdictions ranked by number of transboundary (TB) species. TB Thr = Threatened (Critically Endangered, Endangered, Vulnerable) species, One Jur. = one (single) jurisdiction species, TB/area = rank for number of transboundary species per km2. Composite World Governance Indicator score is scaled 0-1 (1 = best governance score)

| **Jurisdiction** | **Number of species** | | | **Rank** | | | **WGI score** |
| --- | --- | --- | --- | --- | --- | --- | --- |
| **TB** | **TB Thr** | **One Jur** | **TB** | **TB/area** | **Area** |
| United States | 11234 | 141 | 231 | 1 | 222 | 3 | 0.75 |
| Australia | 11033 | 222 | 706 | 2 | 220 | 6 | 0.82 |
| Indonesia | 10099 | 305 | 75 | 3 | 204 | 8 | 0.47 |
| ABNJ | 9946 | 125 | 31 | 4 | 228 | 1 | NA |
| Papua New Guinea | 9469 | 237 | 17 | 5 | 166 | 21 | 0.38 |
| Japan | 9450 | 207 | 82 | 6 | 188 | 13 | 0.77 |
| Philippines | 9431 | 276 | 45 | 7 | 151 | 25 | 0.43 |
| Taiwan | 8827 | 193 | 17 | 8 | 60 | 94 | 0.72 |
| Malaysia | 8226 | 274 | 1 | 9 | 75 | 77 | 0.59 |
| New Caledonia | 8154 | 142 | 45 | 10 | 207 | 9 | 0.72 |
| Mexico | 8133 | 107 | 174 | 11 | 185 | 17 | 0.43 |
| Solomon Isls | 8058 | 189 | 5 | 12 | 154 | 27 | 0.46 |
| Fiji | 7974 | 135 | 18 | 13 | 140 | 32 | 0.54 |
| China | 7750 | 106 | 11 | 14 | 115 | 41 | 0.44 |
| Vanuatu | 7689 | 123 | 4 | 15 | 97 | 54 | 0.52 |
| Disp (JPN/CHN/TWN) | 7538 | 151 | 0 | 16 | 24 | 167 | NA |
| Palau | 7524 | 116 | 1 | 17 | 96 | 55 | 0.56 |
| Vietnam | 7429 | 173 | 1 | 18 | 101 | 52 | 0.43 |
| Micronesia | 7229 | 153 | 3 | 19 | 186 | 19 | 0.57 |
| Disp (S China Sea) | 7084 | 120 | 1 | 20 | 108 | 48 | NA |
| Kiribati | 7051 | 114 | 0 | 21 | 192 | 18 | 0.57 |
| Marshall Isls | 6969 | 110 | 4 | 22 | 170 | 23 | 0.47 |
| Panama | 6655 | 80 | 28 | 23 | 69 | 95 | 0.52 |
| Tonga | 6465 | 78 | 10 | 24 | 107 | 50 | 0.55 |
| Nicaragua | 6369 | 68 | 0 | 25 | 50 | 120 | 0.32 |
| Costa Rica | 6274 | 82 | 17 | 26 | 102 | 57 | 0.62 |
| India | 6204 | 144 | 12 | 27 | 167 | 26 | 0.48 |
| **SI Table 3 cont.** | | | | | | | |
| Colombia | 6172 | 89 | 20 | 28 | 119 | 49 | 0.46 |
| Disp (AUS/IND/TLS) | 6148 | 123 | 0 | 29 | 31 | 162 | NA |
| Disp (AUS/PNG) | 5702 | 145 | 0 | 30 | 2 | 223 | NA |
| Nauru | 5689 | 31 | 0 | 31 | 74 | 103 | 0.49 |
| East Timor | 5444 | 227 | 0 | 32 | 16 | 181 | 0.41 |
| Guatemala | 5276 | 66 | 0 | 33 | 41 | 150 | 0.38 |
| Madagascar | 5169 | 122 | 20 | 34 | 163 | 34 | 0.35 |
| Howland Isl & Baker Isl | 5160 | 33 | 0 | 35 | 100 | 84 | 0.75 |
| Mozambique | 5144 | 130 | 8 | 36 | 113 | 58 | 0.34 |
| Somalia | 5003 | 102 | 1 | 37 | 139 | 44 | 0.08 |
| Brunei | 4866 | 230 | 0 | 38 | 13 | 199 | 0.62 |
| Seychelles | 4827 | 105 | 5 | 39 | 168 | 31 | 0.57 |
| Tanzania | 4826 | 94 | 2 | 40 | 70 | 117 | 0.39 |
| Tuvalu | 4815 | 115 | 0 | 41 | 175 | 28 | 0.56 |
| Kenya | 4771 | 95 | 2 | 42 | 43 | 152 | 0.39 |
| Sri Lanka | 4720 | 133 | 2 | 43 | 114 | 67 | 0.47 |
| Maldives | 4701 | 84 | 5 | 44 | 152 | 40 | 0.40 |
| Mayotte | 4648 | 93 | 0 | 45 | 32 | 171 | 0.72 |
| South Africa | 4613 | 98 | 111 | 46 | 162 | 36 | 0.53 |
| Wallis & Futuna | 4609 | 72 | 1 | 47 | 77 | 112 | 0.72 |
| Thailand | 4571 | 226 | 4 | 48 | 83 | 106 | 0.44 |
| Juan de Nova Isl | 4558 | 89 | 0 | 49 | 33 | 172 | 0.72 |
| Mauritius | 4542 | 110 | 8 | 50 | 169 | 33 | 0.65 |
| Venezuela | 4509 | 68 | 9 | 51 | 109 | 73 | 0.15 |
| Bahamas | 4491 | 69 | 13 | 52 | 127 | 56 | 0.62 |
| Comoro Isls | 4488 | 95 | 1 | 53 | 56 | 131 | NA |
| Glorioso Isls | 4443 | 87 | 0 | 54 | 25 | 180 | 0.72 |
| Northern Mariana Isls & Guam | 4435 | 90 | 7 | 55 | 157 | 38 | 0.75 |
| Cuba | 4421 | 62 | 2 | 56 | 99 | 91 | 0.41 |
| Yemen | 4357 | 120 | 2 | 57 | 123 | 64 | 0.10 |
| Brazil | 4356 | 83 | 123 | 58 | 211 | 14 | 0.45 |
| **SI Table 3 cont.** |  |  |  |  |  |  |  |
| French Polynesia | 4355 | 77 | 81 | 59 | 217 | 10 | 0.72 |
| British Indian Ocean Territory | 4319 | 102 | 3 | 60 | 136 | 53 | 0.77 |
| Honduras | 4091 | 56 | 1 | 61 | 72 | 123 | 0.37 |
| Belize | 4069 | 57 | 9 | 62 | 22 | 185 | 0.44 |
| New Zealand | 4039 | 64 | 111 | 63 | 215 | 12 | 0.86 |
| Andaman & Nicobar | 4035 | 102 | 4 | 64 | 142 | 51 | 0.48 |
| Aruba | 4005 | 60 | 1 | 65 | 14 | 200 | 0.74 |
| Puerto Rico & Virgin Isls (USA) | 3906 | 60 | 2 | 66 | 73 | 125 | 0.75 |
| Ecuador | 3889 | 58 | 65 | 67 | 199 | 22 | 0.42 |
| Myanmar | 3880 | 136 | 4 | 68 | 126 | 68 | 0.31 |
| Disp (JPN/KOR) | 3798 | 49 | 0 | 69 | 40 | 161 | NA |
| Turks & Caicos Isls | 3699 | 57 | 0 | 70 | 64 | 136 | 0.77 |
| Line Group | 3690 | 58 | 0 | 71 | 212 | 16 | 0.57 |
| Dominican Republic | 3640 | 55 | 0 | 72 | 88 | 110 | 0.45 |
| Jamaica | 3627 | 52 | 0 | 73 | 85 | 116 | 0.55 |
| Guadeloupe & Martinique | 3593 | 56 | 3 | 74 | 59 | 137 | 0.72 |
| Phoenix Group | 3522 | 71 | 1 | 75 | 155 | 47 | 0.57 |
| Haiti | 3510 | 54 | 4 | 76 | 51 | 147 | 0.27 |
| Norfolk Isl | 3488 | 52 | 4 | 77 | 122 | 86 | 0.82 |
| Oecussi Ambeno | 3485 | 28 | 0 | 78 | 1 | 226 | 0.41 |
| Saint Lucia | 3473 | 50 | 0 | 79 | 11 | 205 | 0.61 |
| Bassas da India | 3414 | 26 | 0 | 80 | 54 | 148 | 0.72 |
| Saint Vincent & the Grenadines | 3410 | 51 | 0 | 81 | 26 | 183 | 0.61 |
| Cook Isls | 3395 | 65 | 3 | 82 | 203 | 24 | 0.52 |
| Reunion | 3394 | 94 | 4 | 83 | 103 | 101 | 0.69 |
| Ile Europa | 3369 | 28 | 0 | 84 | 57 | 146 | 0.72 |
| Curacao | 3359 | 32 | 2 | 85 | 23 | 190 | 0.66 |
| Guyana | 3351 | 40 | 0 | 86 | 62 | 138 | 0.46 |
| Samoa | 3307 | 92 | 0 | 87 | 61 | 141 | 0.63 |
| Dominica | 3303 | 53 | 0 | 88 | 20 | 194 | 0.60 |
| Canada | 3266 | 60 | 0 | 89 | 225 | 4 | 0.82 |
| **SI Table 3 cont.** |  |  |  |  |  |  |  |
| Grenada | 3265 | 54 | 0 | 90 | 18 | 197 | 0.56 |
| Saba | 3243 | 52 | 0 | 91 | 7 | 214 | 0.66 |
| Bonaire | 3235 | 31 | 0 | 92 | 10 | 208 | 0.66 |
| Christmas Isl | 3225 | 28 | 1 | 93 | 106 | 96 | 0.82 |
| Palmyra Atoll | 3179 | 41 | 0 | 94 | 176 | 37 | 0.75 |
| Cocos Isls | 3166 | 49 | 1 | 95 | 135 | 75 | 0.82 |
| Anguilla | 3145 | 56 | 0 | 96 | 47 | 159 | 0.67 |
| British Virgin Isls | 3120 | 59 | 0 | 97 | 45 | 163 | 0.77 |
| Suriname | 3089 | 42 | 0 | 98 | 63 | 145 | 0.46 |
| Oman | 3072 | 73 | 21 | 99 | 145 | 65 | 0.53 |
| American Samoa | 3071 | 93 | 0 | 100 | 125 | 90 | 0.68 |
| Saint Kitts & Nevis | 3059 | 50 | 0 | 101 | 9 | 212 | 0.62 |
| Antigua & Barbuda | 3052 | 54 | 0 | 102 | 53 | 154 | 0.58 |
| Barbados | 3041 | 50 | 2 | 103 | 81 | 128 | 0.66 |
| Trinidad & Tobago | 3021 | 60 | 3 | 104 | 44 | 166 | 0.52 |
| Chile | 2955 | 58 | 86 | 105 | 219 | 15 | 0.70 |
| Montserrat | 2917 | 50 | 0 | 106 | 5 | 217 | 0.77 |
| El Salvador | 2855 | 33 | 0 | 107 | 49 | 158 | 0.43 |
| South Korea | 2820 | 55 | 1 | 108 | 116 | 97 | 0.68 |
| Northern Saint-Martin | 2780 | 51 | 0 | 109 | 4 | 221 | 0.72 |
| Jarvis Isl | 2763 | 33 | 0 | 110 | 118 | 99 | 0.75 |
| Sint Eustatius | 2749 | 27 | 0 | 111 | 3 | 227 | 0.66 |
| Spain | 2587 | 63 | 3 | 112 | 156 | 62 | 0.66 |
| Peru | 2546 | 51 | 6 | 113 | 214 | 20 | 0.47 |
| Disp (COL/JAM) | 2508 | 22 | 0 | 114 | 15 | 204 | NA |
| France | 2475 | 59 | 1 | 115 | 133 | 93 | 0.72 |
| Cambodia | 2450 | 120 | 0 | 116 | 37 | 179 | 0.35 |
| Tokelau | 2406 | 30 | 0 | 117 | 128 | 98 | 0.86 |
| Djibouti | 2386 | 74 | 0 | 118 | 8 | 219 | 0.34 |
| Johnston Atoll | 2362 | 34 | 0 | 119 | 149 | 81 | NA |
| French Guiana | 2277 | 41 | 0 | 120 | 79 | 139 | 0.72 |
| **SI Table 3 cont.** |  |  |  |  |  |  |  |
| Ile Tromelin | 2221 | 21 | 0 | 121 | 121 | 109 | 0.72 |
| Wake Isl | 2206 | 33 | 0 | 122 | 147 | 89 | 0.75 |
| Iran | 2192 | 59 | 0 | 123 | 89 | 132 | 0.30 |
| Eritrea | 2176 | 100 | 1 | 124 | 55 | 165 | 0.18 |
| Cayman Isls | 2161 | 50 | 3 | 125 | 76 | 149 | 0.67 |
| Argentina | 2113 | 57 | 11 | 126 | 197 | 35 | 0.50 |
| Portugal | 2078 | 56 | 0 | 127 | 137 | 102 | 0.71 |
| Pakistan | 2072 | 69 | 2 | 128 | 110 | 121 | 0.31 |
| Morocco | 2046 | 62 | 0 | 129 | 131 | 108 | 0.44 |
| Saudi Arabia | 1983 | 115 | 3 | 130 | 112 | 122 | 0.45 |
| Egypt | 1934 | 123 | 5 | 131 | 120 | 118 | 0.34 |
| United Kingdom | 1929 | 44 | 0 | 132 | 209 | 29 | 0.77 |
| Ireland | 1906 | 42 | 1 | 133 | 160 | 87 | 0.78 |
| Sudan | 1884 | 94 | 0 | 134 | 52 | 168 | 0.18 |
| Bermuda | 1856 | 30 | 8 | 135 | 165 | 78 | 0.72 |
| Clipperton Isl | 1844 | 34 | 8 | 136 | 164 | 85 | NA |
| United Arab Emirates | 1824 | 53 | 0 | 137 | 48 | 176 | 0.63 |
| Russia | 1815 | 52 | 7 | 138 | 226 | 5 | 0.37 |
| Azores | 1689 | 39 | 1 | 139 | 200 | 39 | 0.71 |
| Uruguay | 1658 | 61 | 0 | 140 | 92 | 143 | 0.67 |
| Angola | 1622 | 57 | 24 | 141 | 173 | 71 | 0.32 |
| Senegal | 1556 | 66 | 9 | 142 | 105 | 134 | 0.48 |
| Antarctica | 1541 | 29 | 145 | 143 | 227 | 2 | NA |
| Guinea Bissau | 1470 | 56 | 0 | 144 | 87 | 155 | 0.27 |
| Western Sahara | 1454 | 56 | 0 | 145 | 144 | 114 | NA |
| Canary Isls | 1447 | 56 | 1 | 146 | 174 | 79 | 0.66 |
| Guinea | 1438 | 54 | 1 | 147 | 91 | 153 | 0.31 |
| North Korea | 1419 | 39 | 0 | 148 | 98 | 151 | 0.18 |
| Liberia | 1398 | 54 | 1 | 149 | 146 | 115 | 0.35 |
| Sierra Leone | 1391 | 52 | 1 | 150 | 117 | 119 | 0.51 |
| Ghana | 1391 | 59 | 0 | 150 | 141 | 133 | 0.38 |
| **SI Table 3 cont.** |  |  |  |  |  |  |  |
| Equatorial Guinea | 1389 | 58 | 0 | 151 | 159 | 104 | 0.24 |
| Cape Verde | 1381 | 43 | 45 | 152 | 202 | 43 | 0.60 |
| Norway | 1372 | 32 | 2 | 153 | 224 | 7 | 0.85 |
| Gambia | 1370 | 61 | 0 | 154 | 35 | 202 | 0.42 |
| Italy | 1367 | 57 | 2 | 155 | 183 | 66 | 0.60 |
| Iceland | 1365 | 23 | 2 | 156 | 198 | 46 | 0.81 |
| Ivory Coast | 1359 | 56 | 0 | 157 | 124 | 130 | 0.40 |
| Nigeria | 1358 | 55 | 2 | 158 | 130 | 129 | 0.29 |
| Madeira | 1344 | 54 | 3 | 159 | 177 | 76 | 0.71 |
| Gabon | 1335 | 53 | 1 | 160 | 134 | 127 | 0.35 |
| Benin | 1327 | 52 | 0 | 161 | 42 | 191 | 0.44 |
| Algeria | 1322 | 47 | 0 | 162 | 104 | 144 | 0.34 |
| Disp (EGY/SDN) | 1322 | 94 | 0 | 162 | 38 | 198 | NA |
| Togo | 1315 | 52 | 0 | 163 | 27 | 206 | 0.34 |
| Falkland Isls | 1287 | 26 | 2 | 164 | 187 | 63 | 0.77 |
| Namibia | 1278 | 54 | 1 | 165 | 189 | 61 | 0.56 |
| Kerguelen Isls | 1270 | 18 | 21 | 166 | 191 | 60 | 0.72 |
| Tunisia | 1263 | 50 | 0 | 167 | 94 | 156 | 0.46 |
| Greece | 1244 | 45 | 2 | 168 | 184 | 70 | 0.56 |
| Prince Edward Isls | 1242 | 19 | 0 | 169 | 181 | 74 | 0.53 |
| Sao Tome & Principe | 1213 | 40 | 3 | 170 | 111 | 142 | 0.46 |
| Crozet Isls | 1206 | 20 | 2 | 171 | 195 | 59 | 0.72 |
| Faeroe Isls | 1201 | 24 | 0 | 172 | 158 | 111 | 0.77 |
| Croatia | 1176 | 44 | 1 | 173 | 67 | 175 | 0.59 |
| Mauritania | 1165 | 56 | 0 | 174 | 129 | 135 | 0.35 |
| Disp (JPN/KOR 2) | 1160 | 17 | 0 | 175 | 78 | 169 | NA |
| Turkey | 1143 | 43 | 0 | 176 | 161 | 113 | 0.40 |
| Heard & McDonald Isls | 1139 | 16 | 0 | 177 | 179 | 88 | 0.82 |
| Disp (JPN/RUS) | 1138 | 31 | 0 | 178 | 148 | 124 | NA |
| Bangladesh | 1111 | 56 | 0 | 179 | 90 | 160 | 0.34 |
| Amsterdam Isl & Saint Paul Isl | 1104 | 25 | 6 | 180 | 193 | 69 | 0.72 |
| **SI Table 3 cont.** |  |  |  |  |  |  |  |
| South Georgia & South Sandwich Isls | 1066 | 17 | 26 | 181 | 221 | 30 | 0.77 |
| Jersey | 1061 | 28 | 0 | 182 | 6 | 225 | 0.75 |
| Disp (ESH/MAR) | 1049 | 47 | 0 | 183 | 68 | 178 | NA |
| Macquarie Isl | 1029 | 21 | 3 | 184 | 194 | 72 | 0.82 |
| Guernsey | 1023 | 29 | 0 | 185 | 19 | 215 | 0.75 |
| Denmark | 1022 | 23 | 0 | 186 | 153 | 126 | 0.84 |
| Saint Pierre & Miquelon | 1020 | 28 | 0 | 187 | 28 | 209 | 0.72 |
| Ascension | 1008 | 27 | 9 | 188 | 190 | 82 | NA |
| Libya | 965 | 44 | 0 | 189 | 180 | 92 | 0.12 |
| Republique du Congo | 948 | 52 | 1 | 190 | 65 | 182 | 0.17 |
| Greenland | 931 | 16 | 0 | 191 | 223 | 11 | 0.78 |
| Malta | 926 | 38 | 0 | 192 | 80 | 174 | 0.71 |
| Niue | 910 | 32 | 2 | 193 | 178 | 100 | 0.42 |
| Democratic Republic of the Congo | 904 | 49 | 0 | 194 | 46 | 196 | 0.17 |
| Albania | 873 | 41 | 0 | 195 | 30 | 211 | 0.50 |
| Montenegro | 855 | 41 | 0 | 196 | 21 | 218 | 0.53 |
| Cameroon | 845 | 53 | 0 | 197 | 36 | 207 | 0.29 |
| Netherlands | 808 | 22 | 0 | 198 | 93 | 170 | 0.84 |
| Germany | 800 | 21 | 0 | 199 | 86 | 173 | 0.80 |
| Tristan da Cunha | 786 | 28 | 1 | 200 | 213 | 45 | 0.77 |
| Saint Helena | 785 | 25 | 7 | 201 | 201 | 80 | 0.77 |
| Disp (KEN/SOM) | 766 | 28 | 0 | 202 | 84 | 177 | NA |
| Kuwait | 761 | 44 | 0 | 203 | 34 | 210 | 0.48 |
| Pitcairn | 758 | 29 | 1 | 204 | 218 | 42 | 0.77 |
| Qatar | 704 | 44 | 0 | 205 | 66 | 188 | 0.57 |
| Bouvet Isl | 697 | 12 | 0 | 206 | 206 | 83 | 0.85 |
| Belgium | 668 | 22 | 0 | 207 | 12 | 224 | 0.74 |
| Bahrain | 621 | 44 | 0 | 208 | 29 | 216 | 0.45 |
| Sweden | 610 | 23 | 0 | 209 | 196 | 105 | 0.84 |
| Disp (TTO/VEN/GUY) | 580 | 20 | 0 | 210 | 17 | 222 | NA |
| Disp (NGA/STP) | 564 | 29 | 0 | 211 | 82 | 187 | NA |
| **SI Table 3 cont.** |  |  |  |  |  |  |  |
| Israel | 519 | 34 | 1 | 212 | 71 | 195 | 0.63 |
| Lebanon | 515 | 29 | 0 | 213 | 58 | 203 | 0.33 |
| Cyprus | 509 | 32 | 0 | 214 | 150 | 157 | 0.66 |
| Syria | 480 | 28 | 0 | 215 | 39 | 213 | 0.11 |
| Jan Mayen | 412 | 11 | 0 | 216 | 208 | 107 | 0.85 |
| Ukraine | 214 | 13 | 1 | 217 | 205 | 140 | 0.36 |
| Bulgaria | 205 | 13 | 0 | 218 | 143 | 186 | 0.55 |
| Romania | 197 | 13 | 0 | 219 | 138 | 192 | 0.53 |
| Georgia | 167 | 10 | 0 | 220 | 132 | 201 | 0.59 |
| Poland | 109 | 7 | 0 | 221 | 171 | 189 | 0.63 |
| Latvia | 97 | 7 | 0 | 222 | 172 | 193 | 0.66 |
| Estonia | 95 | 7 | 0 | 223 | 182 | 184 | 0.74 |
| Finland | 77 | 5 | 0 | 224 | 216 | 164 | 0.85 |
| Lithuania | 76 | 6 | 0 | 225 | 95 | 220 | 0.68 |
| Singapore | 1 | 0 | 0 | 226 | 210 | 228 | 0.83 |
